# Supplementary material for: Risk Factors for Non-Adherence to cART in Immigrants with HIV Living in the Netherlands: Results from the ROtterdam ADherence (ROAD) Project
Source: PubMed Central journal article supplement (PMC5051866; doi:10.1371/journal.pone.0162800), 2016-10-05
Supplement: pone.0162800.s001.pdf [file pone.0162800.s001.pdf]

### Self-reported adherence questions

| Questions                                                                                                                          | Response options                                                                                                                     |
|------------------------------------------------------------------------------------------------------------------------------------|--------------------------------------------------------------------------------------------------------------------------------------|
| 1. Thinking about the past 4 weeks, how would you rate your ability to take all your medications as your doctor prescribed them?   | A. Very poor<br>B. Poor<br>C. Fair<br>D. Good<br>E. Very good<br>F. Excellent                                                        |
| 2. Thinking about the past 4 weeks, how often did you take all your HIV antiretroviral medications as your doctor prescribed them? | A. None of the time<br>B. A little of the time<br>C. A good bit of the time<br>D. Most of the time<br>E. All of the time             |
| 3. How many days in the past week did you take all anti-HIV medicines that were prescribed?                                        | A. Not one day<br>B. 1 or 2 days<br>C. 3 or 4 days<br>D. 5 or 6 days<br>E. All 7 days                                                |
| 4. When was the last time you missed any of you anti-HIV medications?                                                              | A. Within the past week<br>B. 1-2 weeks ago<br>C. 2-4 weeks ago<br>D. 1-3 months ago<br>E. More than 3 months ago<br>F. Never missed |
