# Supplementary material for: Risk Factors for Non-Adherence to cART in Immigrants with HIV Living in the Netherlands: Results from the ROtterdam ADherence (ROAD) Project
Source: PubMed Central journal article supplement (PMC5051866; doi:10.1371/journal.pone.0162800), 2016-10-05
Supplement: pone.0162800.s002.pdf [file pone.0162800.s002.pdf]

### Adherence measures

| Measures             | Q1            | Q2         | Q3         | Q4         | Result       |
|----------------------|---------------|------------|------------|------------|--------------|
| <b>Adherence I</b>   | A, B, C, D, E | A, B, C, D | A, B, C, D | A, B, C    | Non-adherent |
|                      | F             | E          | E          | D, E, F    | Adherent     |
| <b>Adherence II</b>  | A, B, C, D    | A, B, C, D | A, B, C, D | A, B, C    | Non-adherent |
|                      | E, F          | E          | E          | D, E, F    | Adherent     |
| <b>Adherence III</b> | A, B, C, D    | A, B, C, D | A, B, C, D | A, B       | Non-adherent |
|                      | E, F          | E          | E          | C, D, E, F | Adherent     |
