# Supplementary material for: Risk Factors for Non-Adherence to cART in Immigrants with HIV Living in the Netherlands: Results from the ROtterdam ADherence (ROAD) Project
Source: PubMed Central journal article supplement (PMC5051866; doi:10.1371/journal.pone.0162800), 2016-10-05
Supplement: pone.0162800.s003.pdf [file pone.0162800.s003.pdf]

**Adherence I. Factors related to self-reported non-adherence in cART experienced patients<sup>a</sup>**

| Variable                                   | Univariable Regression |           |       | Multivariable Regression |           |      |
|--------------------------------------------|------------------------|-----------|-------|--------------------------|-----------|------|
|                                            | OR                     | 95% CI    | P     | OR                       | 95% CI    | P    |
| <b>HIV-RNA</b>                             |                        |           |       |                          |           |      |
| <50 copies/ml                              | 1                      |           |       | 1                        |           |      |
| >50 copies/ml                              | 2.05                   | 0.86-4.92 | 0.11  | 2.03                     | 0.67-6.14 | 0.21 |
| <b>Age</b>                                 |                        |           |       |                          |           |      |
| ≥35 years                                  | 1                      |           |       | 1                        |           |      |
| <35 years                                  | 1.74                   | 0.92-3.31 | <0.1  | 2.13                     | 0.92-4.96 | 0.08 |
| <b>Gender</b>                              |                        |           |       |                          |           |      |
| Male                                       | 1                      |           |       |                          |           |      |
| Female                                     | 1.11                   | 0.68-1.79 | 0.68  |                          |           |      |
| <b>1<sup>st</sup> generation immigrant</b> |                        |           |       |                          |           |      |
| No                                         | 1                      |           |       |                          |           |      |
| Yes                                        | 0.61                   | 0.16-2.31 | 0.47  |                          |           |      |
| <b>Region of origin</b>                    |                        |           |       |                          |           |      |
| Sub Saharan Africa                         | 1                      |           |       | 1                        |           |      |
| Caribbean                                  | 0.83                   | 0.43-1.59 | 0.57  | 1.21                     | 0.50-2.94 | 0.67 |
| Latin America                              | 0.55                   | 0.89-1.05 | <0.1  | 0.93                     | 0.39-2.26 | 0.88 |
| Other                                      | 0.46                   | 0.24-0.89 | <0.05 | 0.99                     | 0.37-2.66 | 0.98 |
| <b>Sexual orientation</b>                  |                        |           |       |                          |           |      |
| Homosexual / bisexual                      | 1                      |           |       |                          |           |      |
| Heterosexual                               | 1.34                   | 0.80-2.24 | 0.26  |                          |           |      |
| Does not know                              | 1.10                   | 0.25-4.89 | 0.89  |                          |           |      |
| <b>Living situation</b>                    |                        |           |       |                          |           |      |
| With family                                | 1                      |           |       | 1                        |           |      |
| Single parent                              | 2.33                   | 1.11-4.90 | <0.05 | 2.27                     | 0.80-6.44 | 0.12 |

|                                        |      |           |       |      |            |       |
|----------------------------------------|------|-----------|-------|------|------------|-------|
| <i>Alone</i>                           | 1.49 | 0.87-2.56 | 0.15  | 0.99 | 0.46-2.15  | 0.99  |
| <i>Other</i>                           | 1.84 | 0.67-5.07 | 0.24  | 1.66 | 0.41-6.77  | 0.48  |
| <b>Educational attainment</b>          |      |           |       |      |            |       |
| <i>University</i>                      | 1    |           |       | 1    |            |       |
| <i>Higher vocational school</i>        | 0.96 | 0.47-1.95 | 0.91  | 0.88 | 0.36-2.15  | 0.77  |
| <i>Secondary school</i>                | 1.38 | 0.70-2.69 | 0.35  | 1.12 | 0.48-2.64  | 0.79  |
| <i>No formal educ. / Prim. school</i>  | 2.89 | 1.36-6.16 | <0.01 | 5.41 | 1.84-15.93 | <0.01 |
| <b>Employment status</b>               |      |           |       |      |            |       |
| <i>Paid employment</i>                 | 1    |           |       | 1    |            |       |
| <i>Unemployed</i>                      | 2.25 | 1.21-4.18 | <0.05 | 1.32 | 0.55-3.16  | 0.53  |
| <i>On sick leave</i>                   | 1.19 | 0.53-2.66 | 0.66  | 0.41 | 0.12-1.41  | 0.16  |
| <i>Other</i>                           | 1.33 | 0.71-2.51 | 0.38  | 0.92 | 0.37-2.31  | 0.87  |
| <b>Alcoholic beverage &lt;30 days</b>  |      |           |       |      |            |       |
| <i>No</i>                              | 1    |           |       |      |            |       |
| <i>Yes</i>                             | 0.90 | 0.56-1.45 | 0.67  |      |            |       |
| <b>Alcohol use ≥3 days per week</b>    |      |           |       |      |            |       |
| <i>No</i>                              | 1    |           |       | 1    |            |       |
| <i>Yes</i>                             | 2.57 | 1.19-5.55 | <0.05 | 2.57 | 0.98-6.77  | 0.06  |
| <b>Drugs use &lt; 30 days</b>          |      |           |       |      |            |       |
| <i>No</i>                              | 1    |           |       |      |            |       |
| <i>Yes</i>                             | 1.09 | 0.57-2.09 | 0.80  |      |            |       |
| <b>Social support (75)</b>             |      |           |       |      |            |       |
| <i>High social support</i>             | 1    |           |       | 1    |            |       |
| <i>Low social support</i>              | 2.38 | 1.44-3.96 | <0.01 | 2.41 | 1.19-4.89  | <0.05 |
| <b>Internalized HIV-related stigma</b> |      |           |       |      |            |       |
| <i>Low internalized stigma</i>         | 1    |           |       | 1    |            |       |
| <i>High internalized stigma</i>        | 1.97 | 1.19-3.25 | <0.01 | 1.35 | 0.69-2.63  | 0.38  |

|                            |      |           |        |      |           |        |
|----------------------------|------|-----------|--------|------|-----------|--------|
| <b>Self-efficacy (105)</b> |      |           |        |      |           |        |
| <i>High self-efficacy</i>  | 1    |           |        | 1    |           |        |
| <i>Low self-efficacy</i>   | 3.96 | 2.25-6.95 | <0.001 | 3.24 | 1.67-6.31 | <0.001 |
| <b>Quality of life</b>     |      |           |        |      |           |        |
| <i>High physical QoL</i>   | 1    |           |        | 1    |           |        |
| <i>Low physical QoL</i>    | 1.66 | 1.02-2.69 | <0.05  | 1.64 | 0.81-3.30 | 0.17   |
| <i>High mental QoL</i>     | 1    |           |        | 1    |           |        |
| <i>Low mental QoL</i>      | 1.79 | 1.09-2.93 | <0.05  | 0.97 | 0.49-1.92 | 0.93   |

Educ, Education; Prim, Primary; QoL, Quality of Life.

<sup>a</sup>All variables with a  $P < 0.15$  in the univariable analyses were submitted in multivariable analyses.
