# Supplementary material for: Risk Factors for Non-Adherence to cART in Immigrants with HIV Living in the Netherlands: Results from the ROtterdam ADherence (ROAD) Project
Source: PubMed Central journal article supplement (PMC5051866; doi:10.1371/journal.pone.0162800), 2016-10-05
Supplement: pone.0162800.s004.pdf [file pone.0162800.s004.pdf]

**Adherence III. Factors related to self-reported non-adherence in cART experienced patients<sup>a</sup>**

| Variable                                   | Univariable Regression |           |       | Multivariable Regression |           |      |
|--------------------------------------------|------------------------|-----------|-------|--------------------------|-----------|------|
|                                            | OR                     | 95% CI    | P     | OR                       | 95% CI    | P    |
| <b>HIV-RNA</b>                             |                        |           |       |                          |           |      |
| <50 copies/ml                              | 1                      |           |       | 1                        |           |      |
| >50 copies/ml                              | 2.41                   | 1.09-5.28 | <0.05 | 2.44                     | 0.90-6.57 | 0.08 |
| <b>Age</b>                                 |                        |           |       |                          |           |      |
| ≥35 years                                  | 1                      |           |       | 1                        |           |      |
| <35 years                                  | 1.35                   | 0.76-2.39 | 0.31  |                          |           |      |
| <b>Gender</b>                              |                        |           |       |                          |           |      |
| Male                                       | 1                      |           |       |                          |           |      |
| Female                                     | 1.12                   | 0.71-1.77 | 0.64  |                          |           |      |
| <b>1<sup>st</sup> generation immigrant</b> |                        |           |       |                          |           |      |
| No                                         | 1                      |           |       |                          |           |      |
| Yes                                        | 1.42                   | 0.44-4.58 | 0.56  |                          |           |      |
| <b>Region of origin</b>                    |                        |           |       |                          |           |      |
| Sub Saharan Africa                         | 1                      |           |       | 1                        |           |      |
| Caribbean                                  | 0.97                   | 0.52-1.79 | 0.92  | 1.93                     | 0.82-4.50 | 0.13 |
| Latin America                              | 0.65                   | 0.35-1.21 | 0.18  | 1.34                     | 0.53-3.42 | 0.54 |
| Other                                      | 0.46                   | 0.36-0.89 | <0.05 | 1.04                     | 0.38-2.86 | 0.94 |
| <b>Sexual orientation</b>                  |                        |           |       |                          |           |      |
| Homosexual / bisexual                      | 1                      |           |       | 1                        |           |      |
| Heterosexual                               | 1.57                   | 0.95-2.58 | <0.1  | 1.25                     | 0.58-2.70 | 0.57 |
| Does not know                              | 1.39                   | 0.33-5.88 | 0.66  | 2.21                     | 0.27-17.8 | 0.46 |
| <b>Living situation</b>                    |                        |           |       |                          |           |      |
| With family                                | 1                      |           |       |                          |           |      |
| Single parent                              | 1.33                   | 0.69-2.58 | 0.40  |                          |           |      |

|                                        |      |           |        |      |           |       |
|----------------------------------------|------|-----------|--------|------|-----------|-------|
| <i>Alone</i>                           | 1.34 | 0.79-2.27 | 0.27   |      |           |       |
| <i>Other</i>                           | 1.99 | 0.77-5.17 | 0.16   |      |           |       |
| <b>Educational attainment</b>          |      |           |        |      |           |       |
| <i>University</i>                      | 1    |           |        | 1    |           |       |
| <i>Higher vocational school</i>        | 0.99 | 0.49-2.02 | 0.98   | 0.89 | 0.35-2.23 | 0.79  |
| <i>Secondary school</i>                | 1.33 | 0.69-2.58 | 0.40   | 0.71 | 0.29-1.73 | 0.46  |
| <i>No formal educ. / Prim. school</i>  | 2.62 | 1.30-5.29 | <0.01  | 2.83 | 1.12-7.14 | <0.05 |
| <b>Employment status</b>               |      |           |        |      |           |       |
| <i>Paid employment</i>                 | 1    |           |        | 1    |           |       |
| <i>Unemployed</i>                      | 2.89 | 1.62-5.17 | <0.001 | 2.05 | 0.91-4.63 | 0.08  |
| <i>On sick leave</i>                   | 1.37 | 0.63-3.01 | 0.43   | 0.53 | 0.17-1.64 | 0.26  |
| <i>Other</i>                           | 1.71 | 0.92-3.16 | <0.1   | 0.99 | 0.41-2.38 | 0.97  |
| <b>Alcoholic beverage &lt;30 days</b>  |      |           |        |      |           |       |
| <i>No</i>                              | 1    |           |        |      |           |       |
| <i>Yes</i>                             | 0.81 | 0.51-1.27 | 0.35   |      |           |       |
| <b>Alcohol use ≥3 days per week</b>    |      |           |        |      |           |       |
| <i>No</i>                              | 1    |           |        |      |           |       |
| <i>Yes</i>                             | 1.43 | 0.76-2.68 | 0.27   |      |           |       |
| <b>Drugs use &lt; 30 days</b>          |      |           |        |      |           |       |
| <i>No</i>                              | 1    |           |        |      |           |       |
| <i>Yes</i>                             | 1.35 | 0.72-2.51 | 0.35   |      |           |       |
| <b>Social support</b>                  |      |           |        |      |           |       |
| <i>High social support</i>             | 1    |           |        | 1    |           |       |
| <i>Low social support</i>              | 2.73 | 1.68-4.42 | <0.001 | 2.76 | 1.47-5.19 | <0.01 |
| <b>Internalized HIV-related stigma</b> |      |           |        |      |           |       |
| <i>Low internalized stigma</i>         | 1    |           |        | 1    |           |       |
| <i>High internalized stigma</i>        | 2.12 | 1.32-3.41 | <0.01  | 1.56 | 0.83-2.92 | 0.17  |

|                           |      |           |        |      |           |       |
|---------------------------|------|-----------|--------|------|-----------|-------|
| <b>Self-efficacy</b>      |      |           |        |      |           |       |
| <i>High self-efficacy</i> | 1    |           |        | 1    |           |       |
| <i>Low self-efficacy</i>  | 3.07 | 1.84-5.15 | <0.001 | 2.99 | 1.57-5.73 | <0.01 |
| <b>Quality of life</b>    |      |           |        |      |           |       |
| <i>High physical QoL</i>  | 1    |           |        | 1    |           |       |
| <i>Low physical QoL</i>   | 1.64 | 1.03-2.61 | <0.05  | 1.30 | 0.68-2.50 | 0.43  |
| <i>High mental QoL</i>    | 1    |           |        | 1    |           |       |
| <i>Low mental QoL</i>     | 1.89 | 1.19-3.01 | <0.01  | 1.18 | 0.62-2.53 | 0.62  |

Educ, Education; Prim, Primary; QoL, Quality of Life.

<sup>a</sup>All variables with a  $P < 0.15$  in the univariable analyses were submitted in multivariable analyses.
