# Supplementary material for: Risk Factors for Non-Adherence to cART in Immigrants with HIV Living in the Netherlands: Results from the ROtterdam ADherence (ROAD) Project
Source: PubMed Central journal article supplement (PMC5051866; doi:10.1371/journal.pone.0162800), 2016-10-05
Supplement: pone.0162800.s005.pdf [file pone.0162800.s005.pdf]

**Association between adherence and HIV-RNA**

| <b>Variable</b>     | <b>HIV-RNA</b>           |                       | OR   | 95% CI     | P    |
|---------------------|--------------------------|-----------------------|------|------------|------|
|                     | <i>&lt;400 copies/ml</i> | <i>≥400 copies/ml</i> |      |            |      |
| <b>Adherence</b>    |                          |                       |      |            |      |
| <i>Adherent</i>     | 137                      | 2                     | 1    |            |      |
| <i>Non-adherent</i> | 147                      | 12                    | 5.59 | 1.23-25.44 | 0.26 |
